# Supplementary material for: Stability, scalability, and reusability of a volume efficient biocatalytic system constructed on magnetic nanoparticles
Source: Royal Society of Chemistry journal article supplement (doi:10.1039/c5cy01458a), 2015-11-24
Supplement: c5cy01458a1.pdf [file c5cy01458a1.pdf]

## Stability, Scalability, and Reusability of a Volume Efficient Biocatalytic System Constructed on Magnetic Nanoparticles

Gayan Premaratne,<sup>a</sup> Rajasekhara Nerimetla,<sup>a</sup> Ryan Matlock,<sup>a</sup> Loren Sunday,<sup>a</sup> Rangika S. Hikkaduwa Koralege,<sup>b</sup> Joshua D. Ramsey,<sup>b</sup> and Sadagopan Krishnan<sup>a,\*</sup>

<sup>a</sup> Department of Chemistry, Oklahoma State University, Stillwater, OK 74078, USA.

E-mail: [gopan.krishnan@okstate.edu](mailto:gopan.krishnan@okstate.edu)

<sup>b</sup> School of Chemical Engineering, Oklahoma State University, Stillwater, OK 74078, USA.

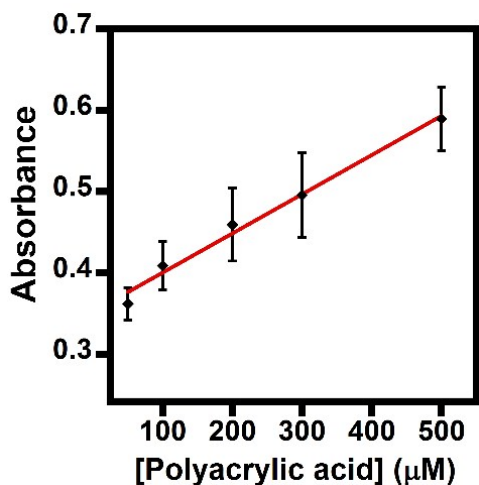

Fig. S1 Calibration plot of standard poly(acrylic acid) solution estimated by the TBO colorimetric assay.

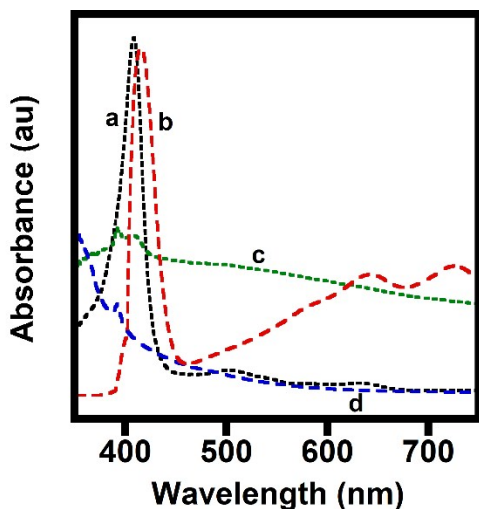

Fig. S2 UV-Vis spectra of (a) free Mb solution ( $\lambda_{\max} = 409$  nm) and (b) ABTS oxidation product ( $\lambda_{\max} = 415$  nm) catalyzed by Mb-MNPs<sub>1mg</sub>. The spectra of (c) Mb-MNPs<sub>1mg</sub> conjugate and (d) free MNPs<sub>1mg</sub> in PBS solutions show no interference with the ABTS product peak identification.
